# Supplementary material for: New biallelic mutations in PADI6 cause recurrent preimplantation embryonic arrest characterized by direct cleavage
Source: Springer Nature journal article supplement (doi:10.1007/s10815-019-01606-7), 2019-10-29
Supplement: MOESM3 [file 17326826]

**New Biallelic Mutations in PADI6 Cause Recurrent Preimplantation Embryonic Arrest Characterized by Direct Cleavage**

Wei Zheng 1#, Longbin Chen2,3,Jing Dai 2,3, Can Dai 1,Jing Guo 1,Changfu Lu 1,2,3, Fei Gong1,2,3, Guangxiu Lu 1,2,3 and Ge Lin1,2,3*

1 Reproductive and Genetic Hospital of CITIC-XIANGYA, ChangSha 410078, China

2 Institute of Reproductive and Stem Cell Engineering, School of Basic Medical Science, Central South University, ChangSha, 410078, China

3 Laboratory of Reproductive and Stem Cell Engineering, National Health and Family Planning Commission, ChangSha, 410078, China

**Supplemental Table 1 Filtering of WES variants in the two infertile women**

|  | Patient 1 | Patient 2 |
| --- | --- | --- |
| Total SNVs/INDELs | 101,603 | 98,937 |
| Rare variants (MAF<1%) in public databases a | 4,647 | 4,239 |
| Exonic nonsynonymous or splice site b variants or coding INDELs | 1,060 | 1,156 |
| Homozygous/may compound-heterozygous variants shared by both patients | 50 | |
| Oocyte expression c PRKM＞100 | *PADI6* (absence in control subjects) | |

a Public databases include the Genome AD, 1000 Genomes, and the ExAC Browser.

b A splice site variant is defined if it is within 2 bp away from an exon/intron boundary.

c Oocyte expression data not yet published.

**Supplemental Table 2 Summary of the reported *PADI6* mutations**

| **Mutations** | **Heterozygous/homozygous** | **Inheritance pattern** | | **Fertilization rate** | **Outcome** | **Reference** |
| --- | --- | --- | --- | --- | --- | --- |
| c.1141C > T (p.Q381*) | Homo- | AR | 66.7% (22/33) | | Embryonic Arrest | [9] |
| c.633T > A (p.H211Q) c.2009_2010del (p.E670Gfs*48) | com Hetero- | AR | 85.7% (18/21) | | Embryonic Arrest |
| c.970C > T (p.Q324*) c.1618G > A (p.G540R) | com Hetero- | AR | 96.9% (31/32) | | Embryonic Arrest |
| c.866C > T (p.P289L) c.1895C > T (p.P632L) | com Hetero- | AR | 50.0% (7/14) | | Embryonic Arrest | [11] |
| c.1124dupT (p.L375Ffs*13) | Homo- | AR | 43.8% (7/16) | | Embryonic Arrest |
| c.1369C > T (p.R457*) | Homo- | AR | Unknown | | Cleavage Failure | [16] |
| c.1793A > G (p.N598S)  c.2045 G > A (p.R682Q) | com Hetero- | AR | Unknown | | Hydatidiform Mole | [15] |
| c.1117A > C (p.T373P) c.1708C > T (p.R570C) | com Hetero- | AR | 63.9% (23/36) | | Abnormal Cleavage | Our study |
| c.1521dupC (p.S508Qfs*5) | Homo- | AR | 86.5% (32/37) | | Abnormal Cleavage |
